# Supplementary material for: Metabolic Patterns of High-Invasive and Low-Invasive Oral Squamous Cell Carcinoma Cells Using Quantitative Metabolomics and 13C-Glucose Tracing
Source: MDPI journal article supplement (doi:10.3390/biom13121806), 2023-12-18
Supplement: s1 [file s1]

## Supplementary Information

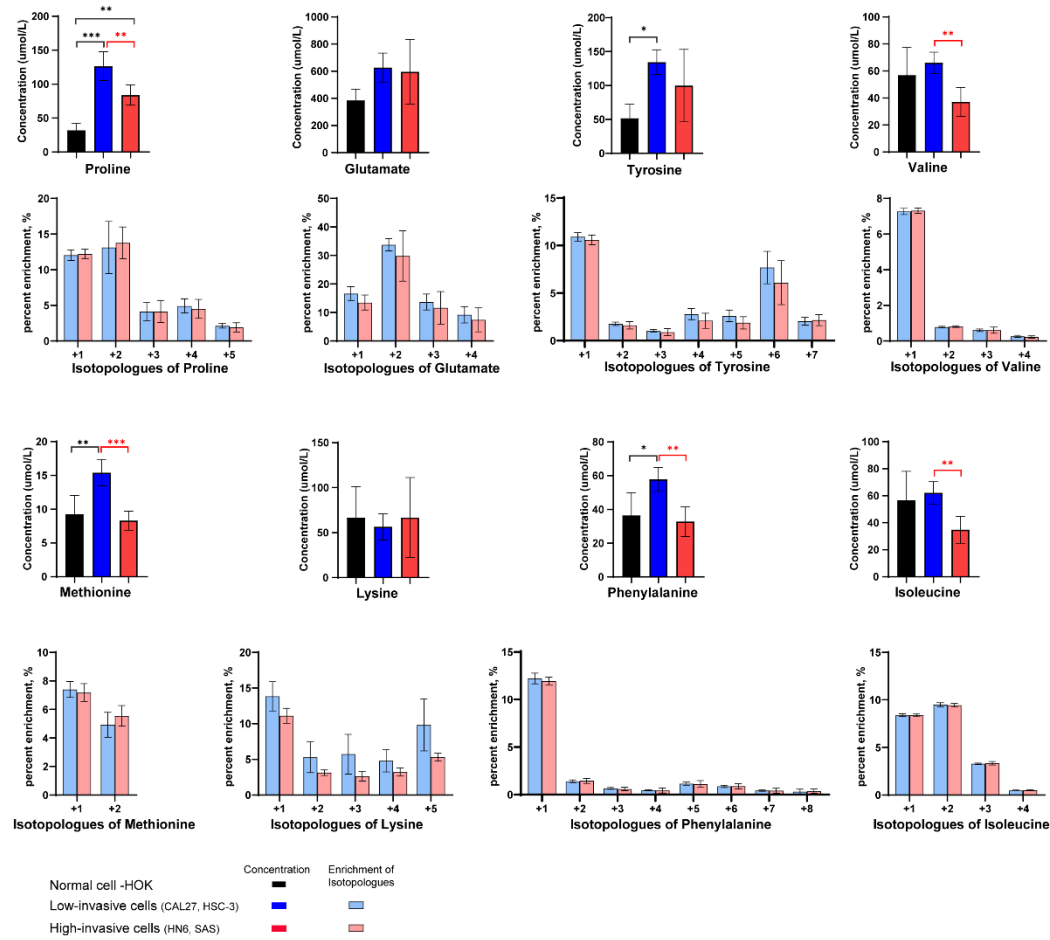

**Supplementary Figure S1:** The intracellular amino acids metabolic differences between high-invasive cells (HN6, SAS) and low-invasive cells (CAL27, HSC-3). Bar plots demonstrated absolute concentrations of amino acids. Black represents normal cell, blue represents low-invasive cells, red represents high-invasive cells. Pink and light blue bar plots showed the enrichment fractions of  $^{13}\text{C}$ -amino acids from  $[\text{U}-^{13}\text{C}_6]$  glucose.
